# Supplementary material for: Theoretical insights into interfacial stability and ionic transport of Li2OHBr solid electrolyte for all-solid-state batteries
Source: Royal Society of Chemistry journal article supplement (doi:10.1039/d2ra06921k), 2022-01-01
Supplement: d2ra06921k1.pdf [file d2ra06921k1.pdf]

## Supporting Information

### Theoretical insights into interfacial stability and ionic transport of $\text{Li}_2\text{OHBr}$ solid electrolyte for all-solid-state batteries

Bo Liu,<sup>a,b\*</sup> Piguang Liao,<sup>a</sup> Xiaowen Shi,<sup>b</sup> Yufeng Wen,<sup>a</sup> Qingdong Gou,<sup>a</sup> Meidong Yu,<sup>a</sup>

Shenlin Zhou,<sup>a</sup> Xinyuan Sun<sup>a</sup>

<sup>a</sup> College of Mathematics and Physics, Jinggangshan University, Ji'an, Jiangxi 343009, China

<sup>b</sup> Science and Technology Innovation Development Center, Ji'an, Jiangxi 343006, China

\*E-mail: Bo Liu ([liubo@jgsu.edu.cn](mailto:liubo@jgsu.edu.cn))

**Table S1.** Calculated plateaus for the lithiation and delithiation of  $\text{Li}_2\text{OHBr}$  solid-state electrolyte.

| Potential ref. to $\text{Li}/\text{Li}^+$ (V) | $\mu_{\text{Li}}$ ref. to Li metal (eV) | $\Delta n_{\text{Li}}$ per formula | Phase equilibria                           |
|-----------------------------------------------|-----------------------------------------|------------------------------------|--------------------------------------------|
| 0.80                                          | -0.80                                   | 2.00                               | $\text{Li}_2\text{O}$ , LiH, LiBr          |
|                                               |                                         | 0                                  | $\text{Li}_4\text{H}_3\text{BrO}_3$ , LiBr |
| 3.15                                          | -3.15                                   | -0.67                              | $\text{Li}_4\text{H}_3\text{BrO}_3$ , Br   |

|      |       |       |                                                                       |
|------|-------|-------|-----------------------------------------------------------------------|
| 3.27 | -3.27 | -1.67 | LiH <sub>3</sub> O <sub>2</sub> , Br <sub>2</sub> O <sub>3</sub> , Br |
| 3.96 | -3.29 | -2.00 | Br <sub>2</sub> O <sub>3</sub> , H <sub>2</sub> O, Br                 |

**Table S2.** Predicted reaction products and reaction energies (meV/atom) between cathodes (LiCoO<sub>2</sub>, LiMn<sub>2</sub>O<sub>4</sub> and LiFePO<sub>4</sub>) and Li<sub>2</sub>OHBr solid-state electrolyte.

| Cathodes                                         | Li <sub>2</sub> OHBr,<br><i>x</i> | Phase equilibria                                                                                                                                             | $\Delta E$ (meV/<br>atom) |
|--------------------------------------------------|-----------------------------------|--------------------------------------------------------------------------------------------------------------------------------------------------------------|---------------------------|
| LiCoO <sub>2</sub>                               | -                                 | LiCoO <sub>2</sub> +Li <sub>2</sub> OHBr                                                                                                                     | 0                         |
| Li <sub>0.5</sub> CoO <sub>2</sub>               | 0.5                               | LiH <sub>2</sub> BrO+LiCoO <sub>2</sub> +LiBr+Li <sub>2</sub> CoO <sub>3</sub>                                                                               | -8                        |
|                                                  |                                   |                                                                                                                                                              |                           |
| LiMn <sub>2</sub> O <sub>4</sub>                 | 0.60                              | LiH <sub>2</sub> BrO+LiBr+Mn <sub>3</sub> O <sub>4</sub> +Li <sub>2</sub> MnO <sub>3</sub>                                                                   | -19                       |
|                                                  | 0.50                              | LiH <sub>2</sub> BrO+LiBr+Mn <sub>2</sub> O <sub>3</sub> +Li <sub>2</sub> MnO <sub>3</sub>                                                                   | -17                       |
| Li <sub>0.5</sub> Mn <sub>2</sub> O <sub>4</sub> | 0.75                              | LiMnO <sub>2</sub> +LiBr+Li <sub>2</sub> MnO <sub>3</sub> +LiH <sub>2</sub> BrO                                                                              | -45                       |
|                                                  | 0.733                             | Mn <sub>3</sub> O <sub>4</sub> +LiBr+Li <sub>2</sub> MnO <sub>3</sub> +LiH <sub>2</sub> BrO                                                                  | -47                       |
|                                                  | 0.667                             | Li <sub>2</sub> MnO <sub>3</sub> +LiBr+LiMn <sub>2</sub> O <sub>4</sub> +LiH <sub>2</sub> BrO                                                                | -50                       |
|                                                  | 0.444                             | LiMn <sub>2</sub> O <sub>4</sub> +LiBr+Li <sub>5</sub> Mn <sub>7</sub> O <sub>16</sub> +LiH <sub>2</sub> BrO                                                 | -58                       |
|                                                  | 0.381                             | MnH <sub>4</sub> Br <sub>2</sub> O <sub>2</sub> +LiBr+Li <sub>5</sub> Mn <sub>7</sub> O <sub>16</sub> +LiH <sub>2</sub> BrO                                  | -56                       |
|                                                  | 0.348                             | MnH <sub>4</sub> Br <sub>2</sub> O <sub>2</sub> +LiBr+Li <sub>5</sub> Mn <sub>7</sub> O <sub>16</sub> +Br                                                    | -54                       |
|                                                  | 0.254                             | MnH <sub>4</sub> Br <sub>2</sub> O <sub>2</sub> +Mn <sub>2</sub> O <sub>3</sub> +Li <sub>5</sub> Mn <sub>7</sub> O <sub>16</sub> +Br                         | -45                       |
|                                                  |                                   |                                                                                                                                                              |                           |
| LiFePO <sub>4</sub>                              | 0.667                             | Fe(OH) <sub>2</sub> +LiBr+Li <sub>3</sub> PO <sub>4</sub>                                                                                                    | -40                       |
|                                                  | 0.615                             | FeH <sub>8</sub> Br <sub>2</sub> O <sub>4</sub> +FeO+LiBr+Li <sub>3</sub> PO <sub>4</sub>                                                                    | -39                       |
| Li <sub>0.5</sub> FePO <sub>4</sub>              | 0.75                              | FeO+LiFeO <sub>2</sub> +LiH <sub>2</sub> BrO+LiBr+Li <sub>3</sub> PO <sub>4</sub>                                                                            | -67                       |
|                                                  | 0.714                             | FeHO <sub>2</sub> +FeO+LiH <sub>2</sub> BrO+LiBr+Li <sub>3</sub> PO <sub>4</sub>                                                                             | -75                       |
|                                                  | 0.677                             | FeH <sub>8</sub> (BrO <sub>2</sub> ) <sub>2</sub> +FeO+FeHO <sub>2</sub> +LiBr+Li <sub>3</sub> PO <sub>4</sub>                                               | -79                       |
|                                                  | 0.667                             | FeH <sub>8</sub> (BrO <sub>2</sub> ) <sub>2</sub> +Fe <sub>2</sub> O <sub>3</sub> +FeO+LiBr+Li <sub>3</sub> PO <sub>4</sub>                                  | -80                       |
|                                                  | 0.60                              | FeH <sub>8</sub> (BrO <sub>2</sub> ) <sub>2</sub> +Fe <sub>2</sub> O <sub>3</sub> +LiFePO <sub>4</sub> +LiBr+Li <sub>3</sub> PO <sub>4</sub>                 | -81                       |
|                                                  | 0.49                              | FeH <sub>8</sub> (BrO <sub>2</sub> ) <sub>2</sub> +Fe <sub>2</sub> O <sub>3</sub> +LiFePO <sub>4</sub> +LiFeBr <sub>4</sub> +Li <sub>3</sub> PO <sub>4</sub> | -78                       |
|                                                  | 0.286                             | LiFePHO <sub>5</sub> +LiFePO <sub>4</sub> +LiFeBr <sub>4</sub> +Li <sub>3</sub> PO <sub>4</sub>                                                              | -60                       |
|                                                  | 0.222                             | LiFePHO <sub>5</sub> +LiFePO <sub>4</sub> +LiFeBr <sub>4</sub> +Li <sub>3</sub> Fe <sub>2</sub> (PO <sub>4</sub> ) <sub>3</sub>                              | -53                       |

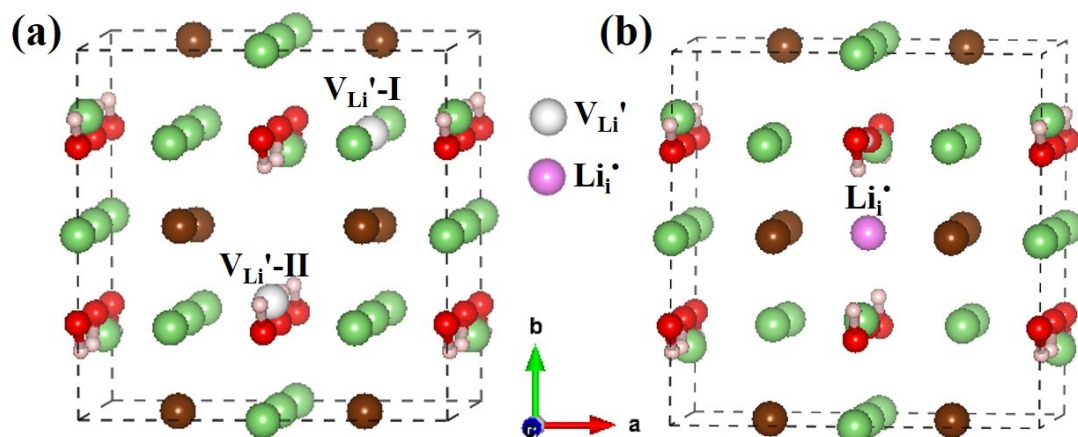

**Figure S1.** Possible defect configurations of the  $\text{Li}_2\text{OHBr}$  in (a) single lithium vacancy ( $V_{\text{Li}}'$ ) and (b) single lithium interstitial ( $\text{Li}_i'$ ).

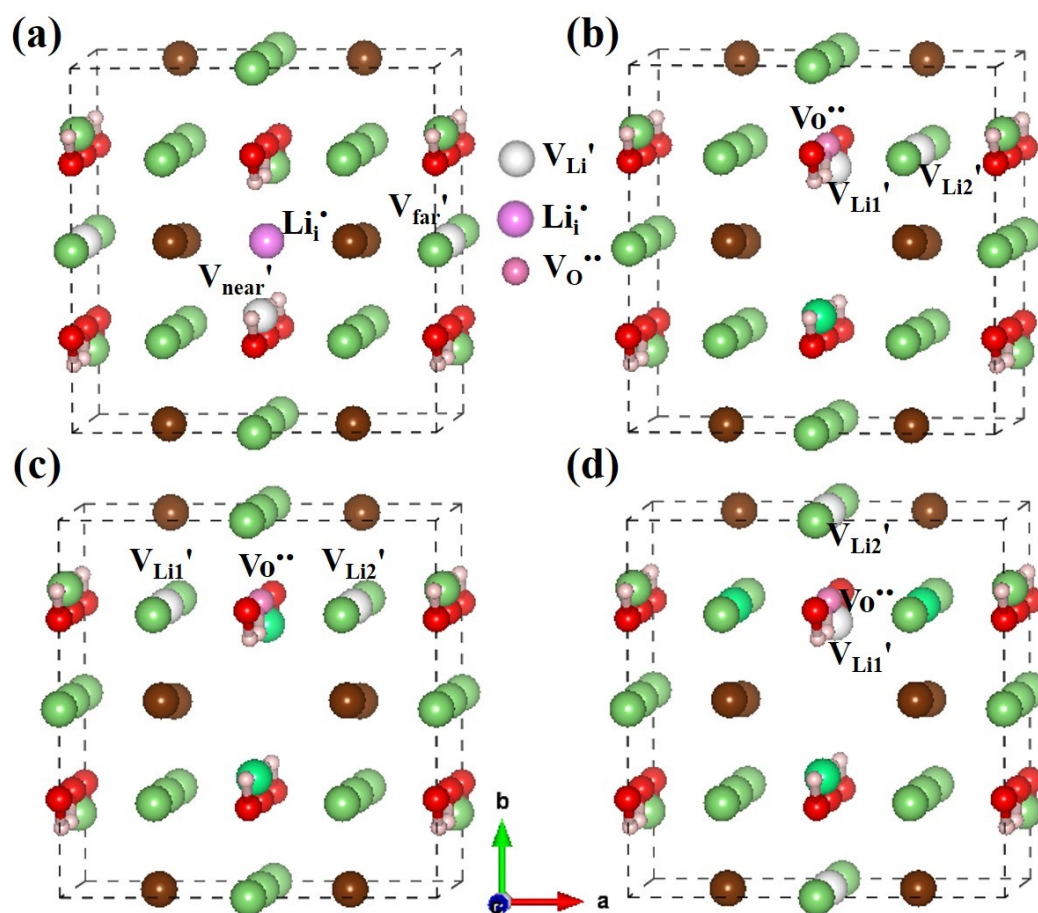

**Figure S2.** Possible defect configurations of the  $\text{Li}_2\text{OHBr}$  in (a) Frenkel defect pair ( $V_{\text{Li}}' - \text{Li}_i'$ ). (b)-(d) show the adjacent, separated-1 and separated-2  $\text{Li}_2\text{O}$  Schottky defect pair ( $2V_{\text{Li}}' - V_{\text{O}}''$ ),
